# Supplementary material
Source: PubMed Central journal article supplement (PMC2757763)
Supplement: NIHMS140829-supplement-1_si_001.pdf [file NIHMS140829-supplement-1_si_001.pdf]

**Figure S1.** Vibrational frequencies for model compounds **4**, **5**, and **6** (a, b, and c respectively). QM frequencies are represented as crosses and MM frequencies as x's.

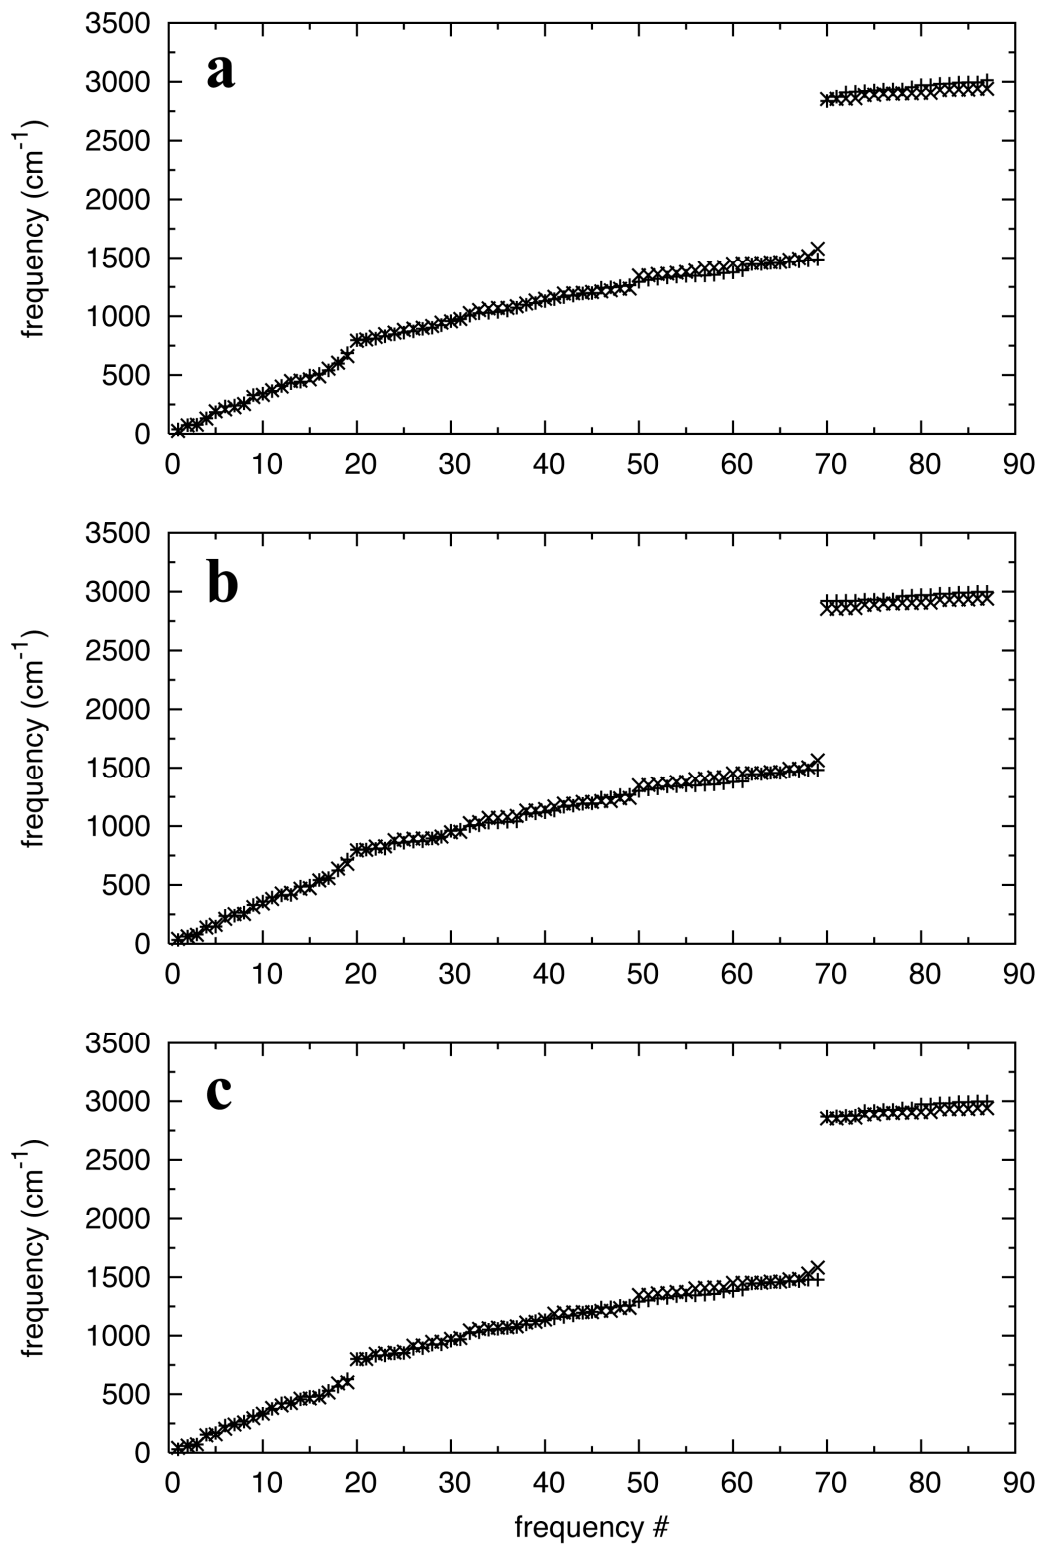

**Figure S2.** Vibrational frequencies for model compounds **7** and **8** (a and b, respectively). QM frequencies are represented as crosses and MM frequencies as x's.

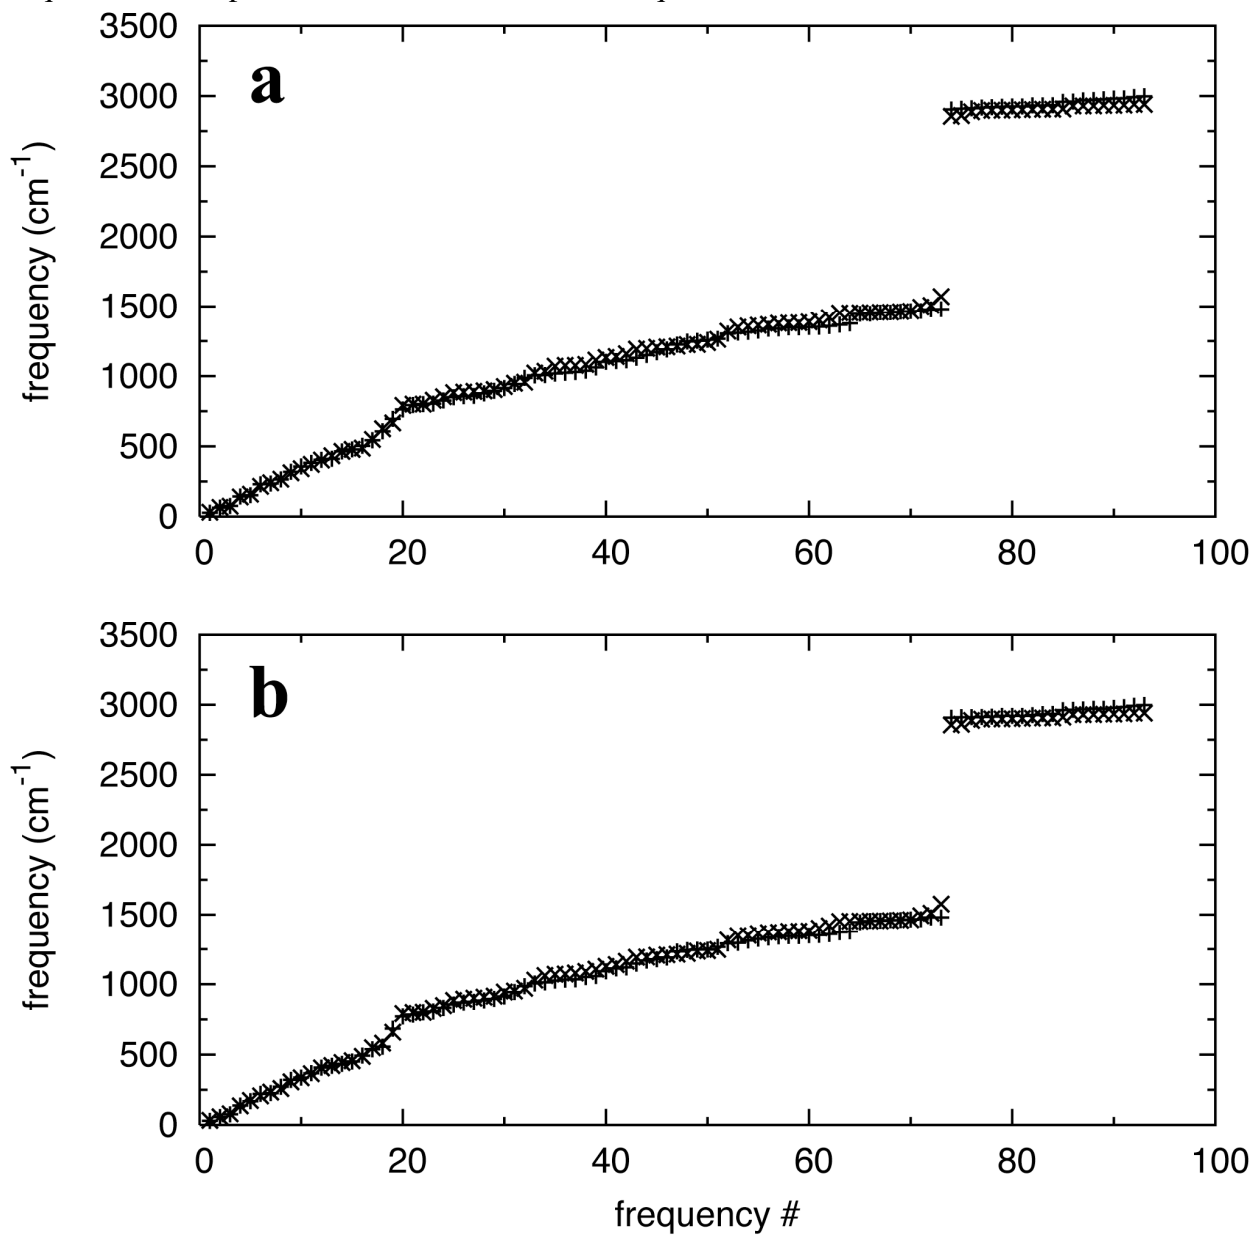

**Figure S3.** Vibrational frequencies for model compounds **11** and **12** (a and b, respectively). QM frequencies are represented as crosses and MM frequencies as x's.

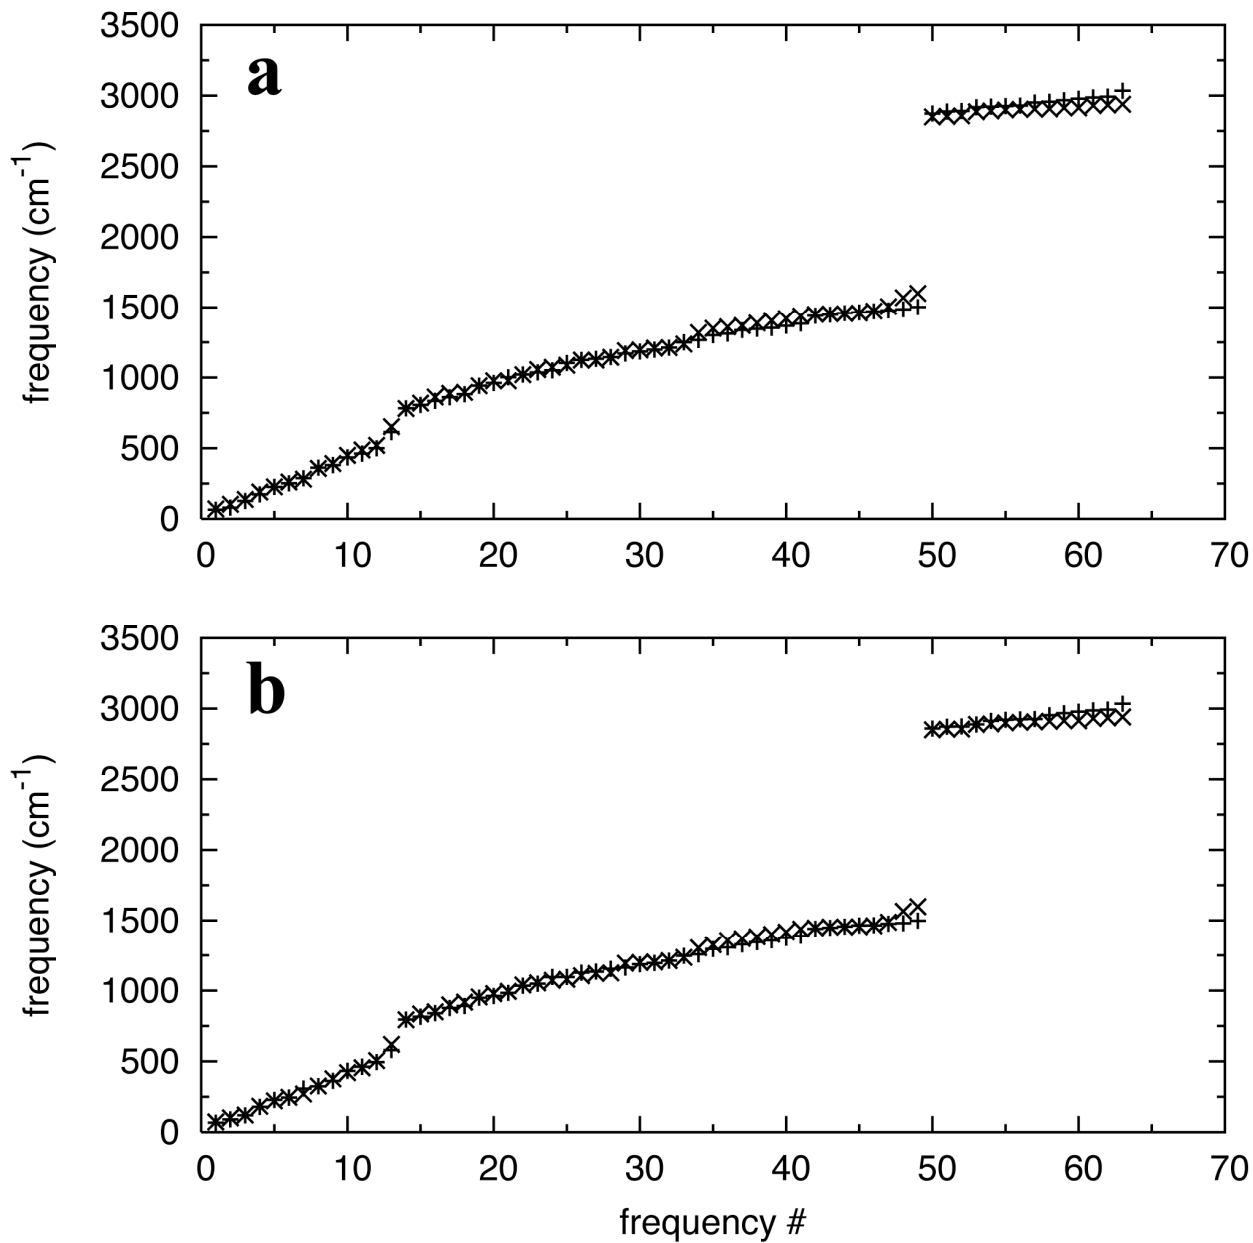

**S4-S8.** CHARMM-compatible patches for 1→1, 1→2, 1→3, 1→4, and 1→6 linkages between hexopyranoses. Patches are compatible with the CHARMM hexopyranose monosaccharide force field described in: Guvench, O.; Greene, S. N.; Kamath, G.; Brady, J. W.; Venable, R. M.; Pastor, R. W.; Mackerell, A. D. *J. Comput. Chem.* **2008**, *29*, 2543-2564. Complete CHARMM carbohydrate force field files, which also include hexopyranose monosaccharides, acyclic polyalcohols, acyclic carbohydrates, and inositol, can be downloaded from <http://mackerell.umaryland.edu>.

**S4. 1→1**

```
PRES 11                0.22
dele atom 1HO1
dele atom 2HO1
dele atom 2O1
ATOM 1C1  CC3162    0.29
ATOM 1O1  OC302   -0.36
ATOM 2C1  CC3162    0.29
BOND 1O1  2C1
```

**S5. 1→2**

```
PRES 12                0.02
dele atom 1HO2
dele atom 2HO1
dele atom 2O1
ATOM 1C2  CC3161    0.09
ATOM 1O2  OC301   -0.36
ATOM 2C1  CC3162    0.29
BOND 1O2  2C1
```

**S6. 1→3**

```
PRES 13                0.02
dele atom 1HO3
dele atom 2HO1
dele atom 2O1
ATOM 1C3  CC3161    0.09
ATOM 1O3  OC301   -0.36
ATOM 2C1  CC3162    0.29
BOND 1O3  2C
```

**S7. 1→4**

```
PRES 14                0.02
```

```

dele atom 1HO4
dele atom 2HO1
dele atom 2O1
ATOM 1C4  CC3161    0.09
ATOM 1O4  OC301   -0.36
ATOM 2C1  CC3162    0.29
BOND 1O4  2C1

```

**S8. 1→6**

```

PRES 16          -0.07
dele atom 1HO6
dele atom 2HO1
dele atom 2O1
ATOM 1C6  CC321    0.00
ATOM 1O6  OC301   -0.36
ATOM 2C1  CC3162    0.29
BOND 1O6  2C1

```

**S9.** CHARMM-compatible parameters for 1→1, 1→2, 1→3, 1→4, and 1→6 linkages between hexopyranoses. Parameters are compatible with the CHARMM hexopyranose monosaccharide force field described in: Guvench, O.; Greene, S. N.; Kamath, G.; Brady, J. W.; Venable, R. M.; Pastor, R. W.; Mackerell, A. D. *J. Comput. Chem.* **2008**, *29*, 2543-2564. Complete CHARMM carbohydrate force field files, which also include hexopyranose monosaccharides, acyclic polyalcohols, acyclic carbohydrates, and inositol, can be downloaded from <http://mackerell.umaryland.edu>.

```

BONDS
! atom types      Kb      b0
CC3162  OC301      360.00  1.395
CC3162  OC302      360.00  1.415
CC3161  OC301      360.00  1.415
CC321   OC301      360.00  1.415

ANGLES
! atom types      Ktheta  theta0
OC301  CC3162  CC3161  45.00  105.00
OC302  CC3162  CC3161  45.00  105.00
OC301  CC3161  CC3162  45.00  109.00
OC311  CC301   OC301   45.00  116.50
OC301  CC3162  OC3C61  90.00  112.00
OC302  CC3162  OC3C61  90.00  112.00
CC3162  OC301   CC331   95.00  109.70
CC3162  OC301   CC321   95.00  109.70
CC3162  OC302   CC3162  50.00  111.50
CC3161  OC301   CC3162  50.00  109.20
HCA1   CC3162  OC301   60.00  109.50
HCA1   CC3162  OC302   60.00  109.50

```

## DIHEDRALS

| ! atom types |        |        |        | Kchi  | n | delta |
|--------------|--------|--------|--------|-------|---|-------|
| CC3161       | CC3161 | CC3162 | OC301  | 0.20  | 3 | 0.0   |
| CC3161       | CC3161 | CC3162 | OC302  | 0.20  | 3 | 0.0   |
| CC3162       | CC3161 | CC3161 | OC301  | 0.20  | 3 | 0.0   |
| CC3161       | CC3162 | OC301  | CC331  | 0.22  | 1 | 0.0   |
| CC3161       | CC3162 | OC301  | CC331  | 0.28  | 2 | 180.0 |
| CC3161       | CC3162 | OC301  | CC331  | 0.89  | 3 | 0.0   |
| CC3161       | CC3162 | OC301  | CC321  | 0.22  | 1 | 0.0   |
| CC3161       | CC3162 | OC301  | CC321  | 0.28  | 2 | 180.0 |
| CC3161       | CC3162 | OC301  | CC321  | 0.89  | 3 | 0.0   |
| CC3161       | CC3162 | OC302  | CC3162 | 0.73  | 1 | 0.0   |
| CC3161       | CC3162 | OC302  | CC3162 | 0.61  | 2 | 180.0 |
| CC3161       | CC3162 | OC302  | CC3162 | 0.00  | 3 | 180.0 |
| CC3161       | CC3162 | OC301  | CC3161 | 0.41  | 1 | 180.0 |
| CC3161       | CC3162 | OC301  | CC3161 | 0.66  | 2 | 180.0 |
| CC3161       | CC3162 | OC301  | CC3161 | 1.60  | 3 | 0.0   |
| CC3162       | CC3161 | OC301  | CC3162 | 0.13  | 1 | 180.0 |
| CC3162       | CC3161 | OC301  | CC3162 | 0.25  | 2 | 180.0 |
| CC3162       | CC3161 | OC301  | CC3162 | 0.06  | 3 | 180.0 |
| CC3161       | CC3161 | OC301  | CC3162 | 0.13  | 1 | 180.0 |
| CC3161       | CC3161 | OC301  | CC3162 | 0.25  | 2 | 180.0 |
| CC3161       | CC3161 | OC301  | CC3162 | 0.06  | 3 | 180.0 |
| CC3163       | CC3161 | OC301  | CC3162 | 0.13  | 1 | 180.0 |
| CC3163       | CC3161 | OC301  | CC3162 | 0.25  | 2 | 180.0 |
| CC3163       | CC3161 | OC301  | CC3162 | 0.06  | 3 | 180.0 |
| CC3163       | CC321  | OC301  | CC3162 | 0.64  | 1 | 180.0 |
| CC3163       | CC321  | OC301  | CC3162 | 0.03  | 2 | 180.0 |
| CC3163       | CC321  | OC301  | CC3162 | 0.61  | 3 | 0.0   |
| OC301        | CC3162 | CC3161 | OC311  | 2.65  | 1 | 180.0 |
| OC301        | CC3162 | CC3161 | OC311  | 0.00  | 2 | 0.0   |
| OC301        | CC3162 | CC3161 | OC311  | 0.13  | 3 | 180.0 |
| OC302        | CC3162 | CC3161 | OC311  | 2.65  | 1 | 180.0 |
| OC302        | CC3162 | CC3161 | OC311  | 0.00  | 2 | 0.0   |
| OC302        | CC3162 | CC3161 | OC311  | 0.13  | 3 | 180.0 |
| OC301        | CC3161 | CC3162 | OC311  | 2.65  | 1 | 180.0 |
| OC301        | CC3161 | CC3162 | OC311  | 0.00  | 2 | 0.0   |
| OC301        | CC3161 | CC3162 | OC311  | 0.13  | 3 | 180.0 |
| OC301        | CC3161 | CC3162 | OC301  | 0.59  | 1 | 180.0 |
| OC301        | CC3161 | CC3162 | OC301  | 1.16  | 2 | 0.0   |
| OC301        | CC3161 | CC3162 | OC3C61 | 2.75  | 1 | 180.0 |
| OC301        | CC3161 | CC3162 | OC3C61 | 0.26  | 2 | 180.0 |
| OC301        | CC3161 | CC3162 | OC3C61 | 0.10  | 3 | 0.0   |
| HCA1         | CC3161 | CC3162 | OC301  | 0.20  | 3 | 0.0   |
| HCA1         | CC3161 | CC3162 | OC302  | 0.20  | 3 | 0.0   |
| OC301        | CC3161 | CC3162 | HCA1   | 0.20  | 3 | 0.0   |
| CC331        | OC301  | CC3162 | HCA1   | 0.284 | 3 | 0.0   |
| CC321        | OC301  | CC3162 | HCA1   | 0.284 | 3 | 0.0   |
| CC3161       | OC301  | CC3162 | HCA1   | 0.284 | 3 | 0.0   |
| CC3162       | OC302  | CC3162 | HCA1   | 0.284 | 3 | 0.0   |
| CC3162       | OC301  | CC3161 | HCA1   | 0.284 | 3 | 0.0   |
| CC3162       | OC301  | CC331  | HCA3   | 0.284 | 3 | 0.0   |
| CC3162       | OC301  | CC321  | HCA2   | 0.284 | 3 | 0.0   |
| CC3163       | OC3C61 | CC3162 | OC301  | 0.41  | 1 | 180.0 |

|        |        |        |        |      |   |       |
|--------|--------|--------|--------|------|---|-------|
| CC3163 | OC3C61 | CC3162 | OC301  | 0.89 | 2 | 0.0   |
| CC3163 | OC3C61 | CC3162 | OC301  | 0.05 | 3 | 0.0   |
| CC3163 | OC3C61 | CC3162 | OC302  | 0.41 | 1 | 180.0 |
| CC3163 | OC3C61 | CC3162 | OC302  | 0.89 | 2 | 0.0   |
| CC3163 | OC3C61 | CC3162 | OC302  | 0.05 | 3 | 0.0   |
| CC331  | OC301  | CC3162 | OC3C61 | 0.14 | 1 | 0.0   |
| CC331  | OC301  | CC3162 | OC3C61 | 0.97 | 2 | 0.0   |
| CC331  | OC301  | CC3162 | OC3C61 | 0.11 | 3 | 180.0 |
| CC321  | OC301  | CC3162 | OC3C61 | 0.14 | 1 | 0.0   |
| CC321  | OC301  | CC3162 | OC3C61 | 0.97 | 2 | 0.0   |
| CC321  | OC301  | CC3162 | OC3C61 | 0.11 | 3 | 180.0 |
| CC3162 | OC302  | CC3162 | OC3C61 | 0.53 | 1 | 0.0   |
| CC3162 | OC302  | CC3162 | OC3C61 | 0.74 | 2 | 0.0   |
| CC3162 | OC302  | CC3162 | OC3C61 | 0.16 | 3 | 0.0   |
| CC3161 | OC301  | CC3162 | OC3C61 | 0.05 | 1 | 180.0 |
| CC3161 | OC301  | CC3162 | OC3C61 | 0.91 | 2 | 0.0   |
| CC3161 | OC301  | CC3162 | OC3C61 | 1.27 | 3 | 180.0 |

## NONBONDED

| ! atom type | epsilon | Rmin/2.0 |
|-------------|---------|----------|
| OC301 0.0   | -0.1000 | 1.6500   |
| OC302 0.0   | -0.1000 | 1.6500   |
